# Supplementary material
Source: publisher figshare collection journal article supplement (https://acs.figshare.com/ndownloader/files/14030477)
Supplement: Supplementary file 1 [file 14030477]

**Supporting Information for**

## **Helical Structure of Recombinant Melittin**

Lisa S. Ramirez,<sup>1</sup> Jayanti Pande,<sup>1</sup> and Alexander Shekhtman<sup>1,\*</sup>

<sup>1</sup>Department of Chemistry, State University of New York at Albany, NY 12222, USA

\*Correspondence: [ashekhtman@albany.edu](mailto:ashekhtman@albany.edu) or [jpande@albany.edu](mailto:jpande@albany.edu)

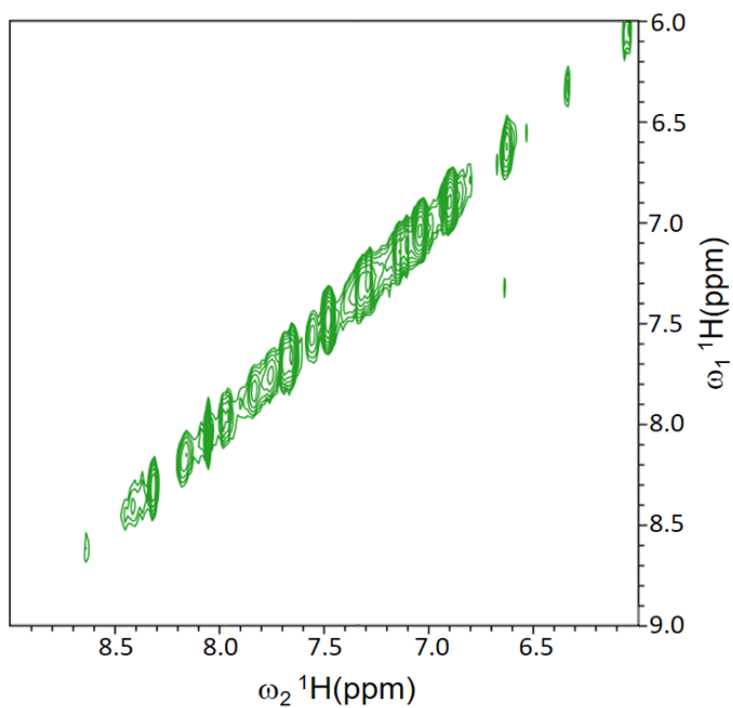

**Figure S1.** 2D  $^1\text{H}$ - $^1\text{H}$  ROESY of melittin at 298 K (related to Figure 1). The spectrum was recorded at 298 K with a mixing time of 200 ms. 50  $\mu\text{M}$  melittin was prepared in NMR buffer with 30% v/v TFE. No cross peaks were observed after collection of 128 transients.

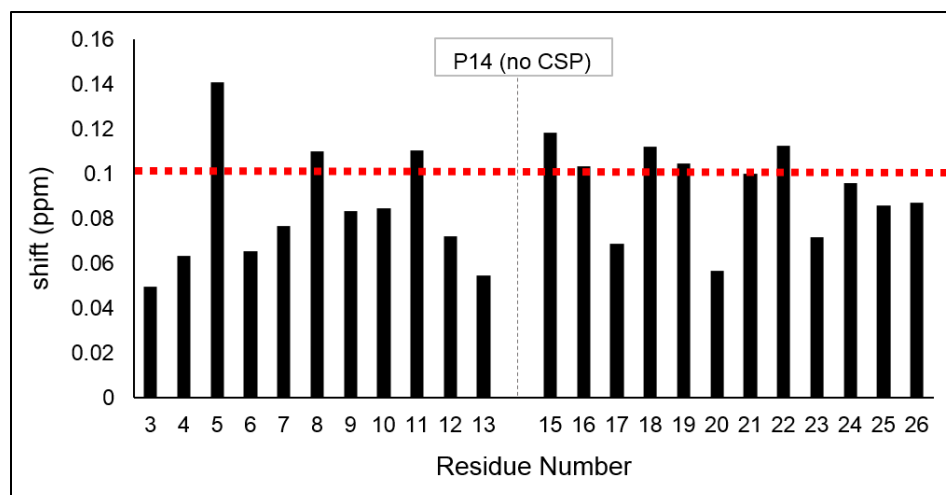

**Figure S2.** Increasing solvent viscosity causes minimal chemical shift perturbations in melittin (related to Figure 2). Chemical shift perturbations (CSPs) induced by adding 10% w/v glycerol to melittin in 30% v/v TFE and lowering the sample temperature from 298 K to 285 K. The CSPs were calculated from the  $^{15}\text{N}$  and  $^1\text{H}$  chemical shifts of melittin taken from  $^1\text{H}$ - $^{15}\text{N}$  HSQC spectra shown in Figure 2. Residues 1-2 and 14 are excluded from the analysis because their NH peaks are not visible in the  $^1\text{H}$ - $^{15}\text{N}$  HSQC spectra. Residue 14 is proline, which does not have an NH peak. The threshold at 0.1 ppm is indicated by a red broken line.

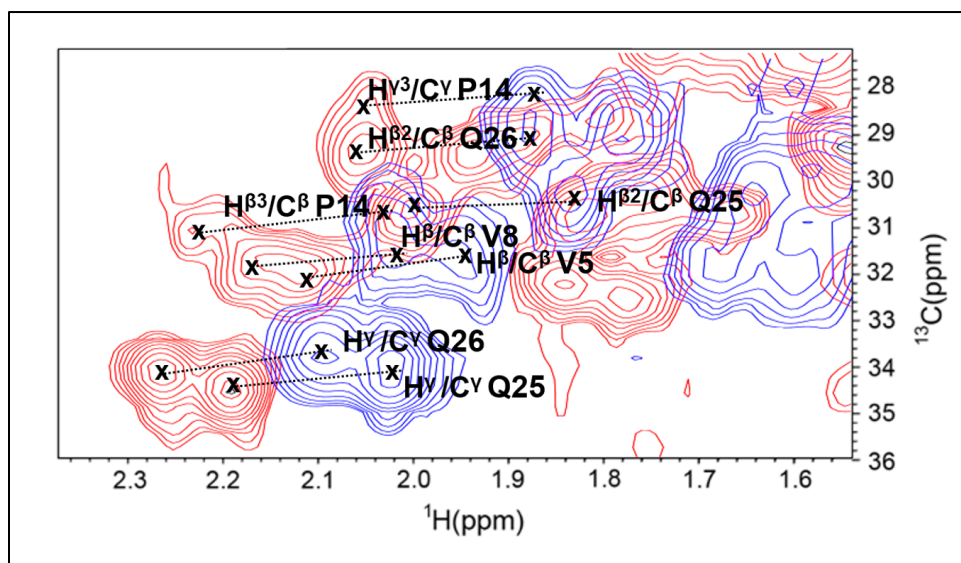

**Figure S3.** Transfer of melittin assignments (related to Figure 2). A representative 2D slice of the HCCH-TOCSY spectrum (red contours) acquired at 298 K is overlaid with the corresponding 2D slice of the  $^1\text{H}$ - $^{13}\text{C}$  NOESY spectrum (blue contours) acquired at 285 K with a mixing time of 200 ms. The sample (50  $\mu\text{M}$  [ $U$ - $^{13}\text{C}$ ,  $^{15}\text{N}$ ]-labeled melittin) was prepared in 10 mM potassium phosphate at pH 7.0 with 30% v/v deuterated TFE, 10% v/v  $\text{D}_2\text{O}$ , and 10% w/v deuterated glycerol.

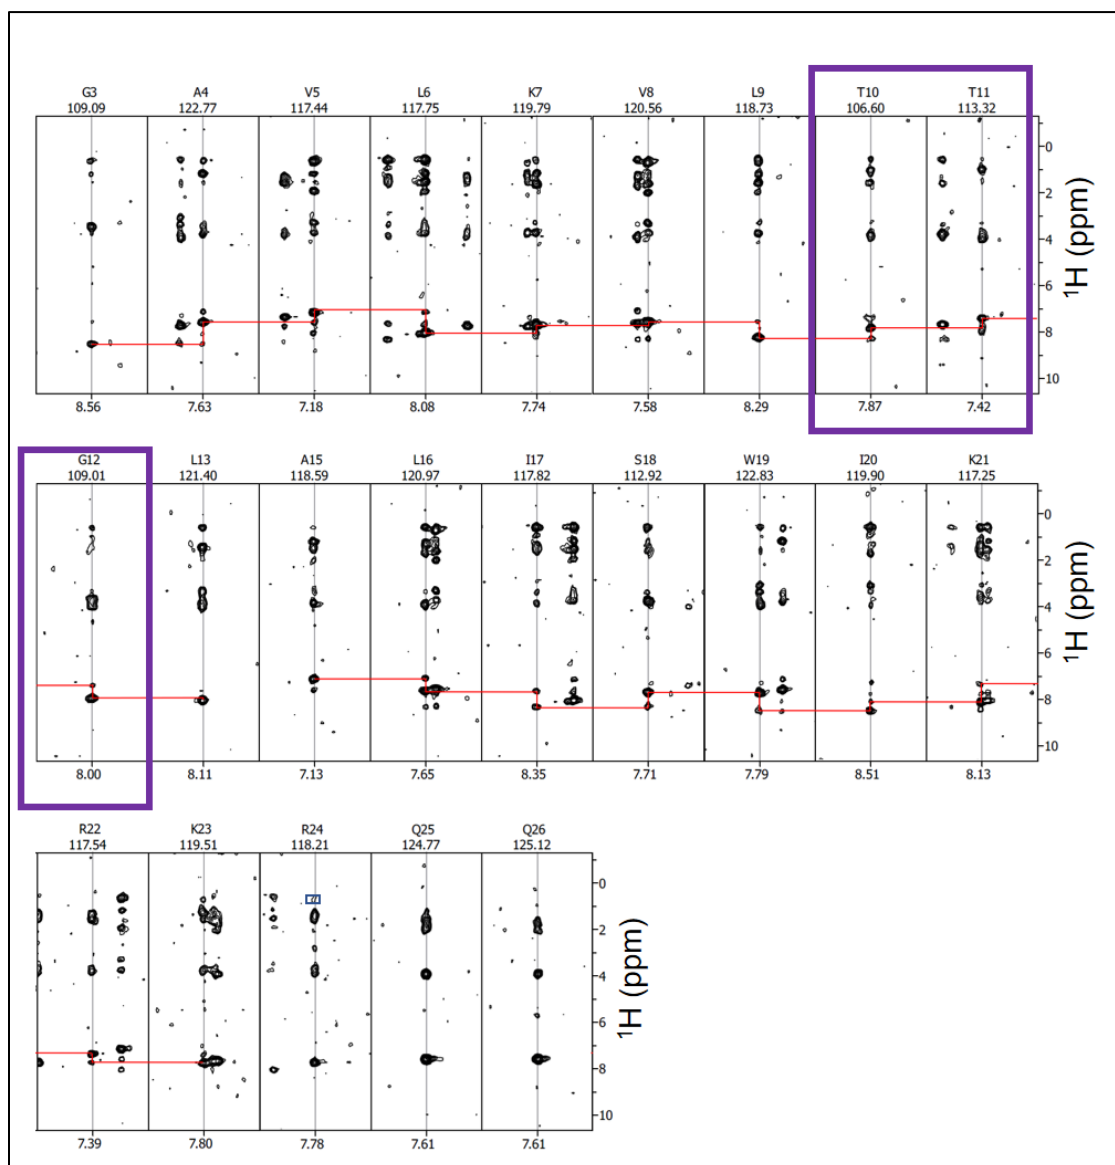

**Figure S4.** Evidence for helical structure in melittin (related to Figure 3). Selected  $\omega_2({}^1\text{H}^{\text{N}})$ - $\omega_3({}^1\text{H}^{\text{NOE}})$  regions from a 3D  ${}^1\text{H}$ - ${}^{15}\text{N}$  NOESY spectrum of  $[U\text{-}^{13}\text{C}, {}^{15}\text{N}]$ -labeled melittin at  $\omega_1({}^{15}\text{N}^{\text{H}})$  chemical shifts. The spectrum was acquired with a mixing time of 200 ms. The strips show sequential NOEs involving backbone amide protons of residues 3-23, connected by red lines. Residues belonging to the hinge region are enclosed in violet boxes.

Table S1. List of hydrogen bonds<sup>a</sup> in PDB entries 2MLT, 2MW6, 3QRX, and 6DST

| 2MLT chain A | 2MLT chain B | 2MW6 <sup>b</sup> | 3QRX        | 6DST <sup>b</sup> |
|--------------|--------------|-------------------|-------------|-------------------|
| Ile2-Leu6    | Ile2-Leu6    | Ile2-Leu6         | Ile2-Leu6   |                   |
| Gly3-Lys7    | Gly3-Lys7    | Gly3-Lys7         | Gly3-Lys7   |                   |
| Ala4-Val8    | Ala4-Val8    | Ala4-Val8         | Ala4-Val8   | Ala4-Val8         |
| Val5-Leu9    | Val5-Leu9    |                   | Val5-Leu9   |                   |
| Leu6-Thr10   | Leu6-Thr10   |                   | Leu6-Thr10  |                   |
|              |              |                   |             | Lys7-Thr10        |
| Lys7-Thr11   | Lys7-Thr11   |                   |             |                   |
|              | Val8-Gly12   |                   | Lys7-Gly12  | Val8-Gly12        |
| Val8-Leu13   | Leu9-Leu13   |                   | Val8-Leu13  |                   |
|              |              |                   |             | Thr10-Leu13       |
|              |              |                   | Thr11-Ala15 | Thr11-Ala15       |
| Gly12-Leu16  | Gly12-Leu16  |                   | Gly12-Leu16 | Gly12-Leu16       |
| Leu13-Ile17  | Leu13-Ile17  |                   | Leu13-Ile17 | Leu13-Ile17       |
| Pro14-Ser18  | Pro14-Ser18  | Pro14-Ser18       | Pro14-Ser18 |                   |
| Ala15-Trp19  | Ala15-Trp19  | Ala15-Trp19       | Ala15-Trp19 | Ala15-Trp19       |
| Leu16-Ile20  | Leu16-Ile20  | Leu16-Ile20       | Leu16-Ile20 |                   |
| Ile17-Lys21  | Ile17-Lys21  | Ile17-Lys21       |             | Ile17-Lys21       |
| Ser18-Arg22  | Ser18-Arg22  | Ser18-Arg22       |             | Ser18-Arg22       |
| Trp19-Lys23  | Trp19-Lys23  | Trp19-Lys23       |             |                   |
| Ile20-Arg24  | Ile20-Arg24  | Ile20-Arg24       |             |                   |
| Lys21-Gln25  | Lys21-Gln25  | Lys21-Gln25       |             |                   |

a) Hydrogen bonds were determined in DSSP<sup>1, 2</sup> using a cut-off bond energy of -1.0 kcal/mol.

b) Hydrogen bonds are listed if they are present in at least 70% of conformers of the ensemble

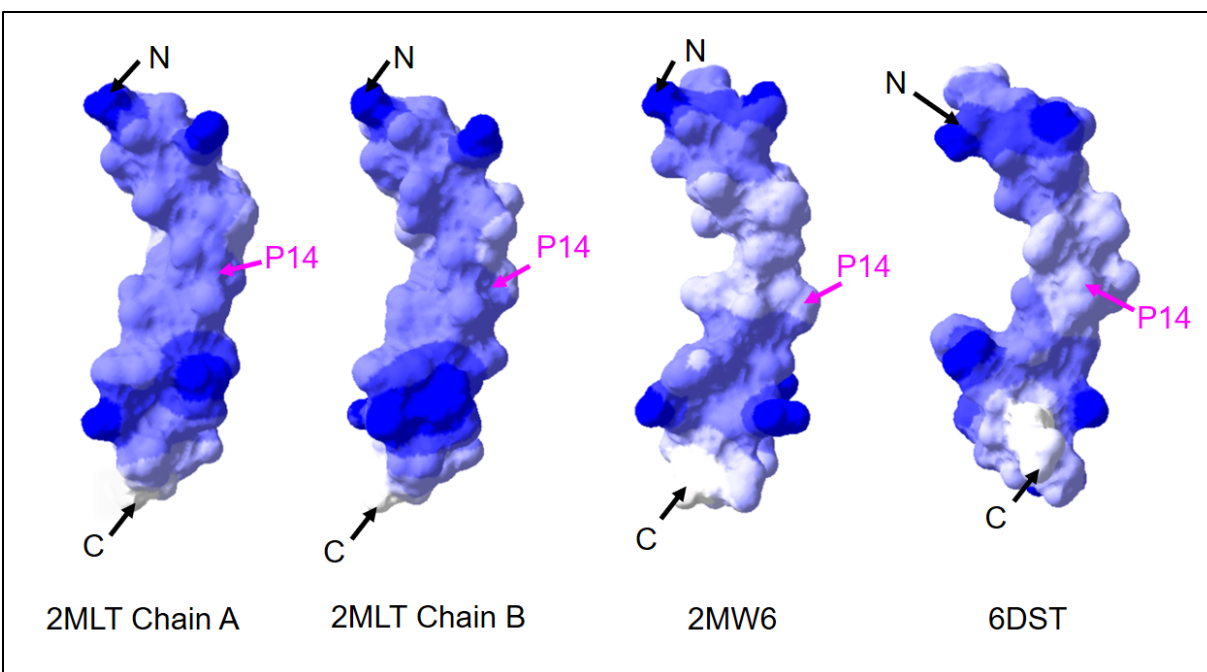

**Figure S5.** Electrostatic potential is mapped onto the molecular surfaces of the crystal structure of tetrameric melittin (PDB ID: **2MLT** chains A and B), the representative NMR structure in methanol (PDB ID: **2MW6**), and the representative NMR structure in TFE/water/glycerol (PDB ID: **6DST**). The structure in **3QRX** was omitted from the comparison because it lacks residues 1, 22-26. Uncharged surfaces are shown in white and positively charged surfaces are rendered in blue, while no negatively charged surfaces (red) are present. Black arrows point to N- and C-terminal residues, and magenta arrows indicate the position of Pro14. (The orientations of the melittin structures shown here are consistent with the backbone traces in Figure 6A).

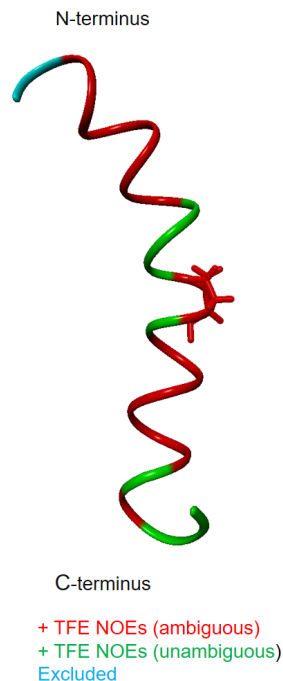

**Figure S6.** Map of TFE-melittin interactions on the 3D solution NMR structure of melittin. The representative structure shown here (model 10) is taken from the ensemble of solution NMR structures in Figure 3A-B, rotated by 90 degrees for ease of viewing. Residues colored red (3-9, 13-14, 16-21, 23) may or may not have surfaces within  $\sim 5$  Å of the TFE proton resonating at 0.6 ppm. The ambiguity arises from the possibility of overlap of the methyl peaks of melittin with a TFE peak at  $\sim 0.6$  ppm. Residues colored green (10-12, 15, 22, 24-26) have NOESY strips clearly showing weak intermolecular NOEs at  $\sim 0.6$  ppm. G1-I2, colored light blue, were excluded from the analysis because they lacked  $^1\text{H}$ - $^{15}\text{N}$  NOESY data.



## References

- [1] Kabsch, W., and Sander, C. (1983) Dictionary of protein secondary structure: Pattern recognition of hydrogen-bonded and geometrical features, *Biopolymers* 22, 2577-2637.
- [2] Joosten, R. P., te Beek, T. A. H., Krieger, E., Hekkelman, M. L., Hooft, R. W. W., Schneider, R., Sander, C., and Vriend, G. (2011) A series of PDB related databases for everyday needs, *Nucleic Acids Res.* 39, D411-D419.
